# Supplementary material for: Interhospital Transfer of Patients With Acute Respiratory Failure in the United States: A Scoping Review
Source: PubMed Central journal article supplement — Crit Care Explor. 2024 Jul 5;6(7):e1120. doi: 10.1097/CCE.0000000000001120 (PMC11230760; doi:10.1097/cce.0000000000001120), 2024-07-05
Supplement: cc9-6-e1120-s001.pdf [file cc9-6-e1120-s001.pdf]

## Appendix:

### Database Search Overview

| Database                                                                                                                 | Coverage         | Date Searched | Results |
|--------------------------------------------------------------------------------------------------------------------------|------------------|---------------|---------|
| Ovid MEDLINE(R) and Epub Ahead of Print, In-Process, In-Data-Review & Other Non-Indexed Citations, Daily and Versions(R) | 1946 to present  | 8/04/2022     | 875     |
| Cochrane Database of Systematic Reviews (Wiley)                                                                          | 1995 to present  | 8/04/2022     | 1       |
| Cochrane Central Register of Controlled Trials (Wiley)                                                                   | N/A              | 8/04/2022     | 46      |
| Embase (Elsevier)                                                                                                        | 1947 to present  | 8/04/2022     | 1075    |
| CINAHL Plus with Full Text (EBSCOhost)                                                                                   | 1937 to present  | 8/04/2022     | 540     |
| APA PsycInfo (EBSCOhost)                                                                                                 | 1800s to present | 8/04/2022     | 16      |
| Total                                                                                                                    |                  |               | 2536    |
| Total After De-Duplication                                                                                               |                  |               | 1318    |

We searched the databases listed above on August 4, 2022. Records from each database were exported to EndNote. Duplicates were removed through the "Find Duplicates" function within EndNote and manual review. Search strategies from each of the bibliographic databases are available below.

Ovid MEDLINE(R) and Epub Ahead of Print, In-Process, In-Data-Review & Other Non-Indexed Citations, Daily and Versions <1946 to August 01, 2022>

|                                                                                                                 |        |
|-----------------------------------------------------------------------------------------------------------------|--------|
| (interfacility or inter-facility or intrahospital or intra-hospital or "hospital to hospital" or "inter-ICU" or |        |
| 1 interhospital or inter-hospital).ab,ti.                                                                       | 8531   |
| 2 exp Patient Transfer/                                                                                         | 9464   |
| 3 exp "Transportation of Patients"/                                                                             | 17732  |
| ((Transfer* or transport* or transition*)                                                                       |        |
| 4 and (client* or patient*)).ab,ti.                                                                             | 254698 |
| 5 2 or 3 or 4                                                                                                   | 271660 |
| 6 1 and 5                                                                                                       | 2788   |
| 7 exp Critical Care/                                                                                            | 64664  |
| 8 exp Intensive Care Units/                                                                                     | 101020 |
| 9 exp Respiratory Care Units/                                                                                   | 617    |

|    |                                                                                                                                                                                                                                                                                                                                                                                                                                                                                                                                                                                                                                                                                                            |        |
|----|------------------------------------------------------------------------------------------------------------------------------------------------------------------------------------------------------------------------------------------------------------------------------------------------------------------------------------------------------------------------------------------------------------------------------------------------------------------------------------------------------------------------------------------------------------------------------------------------------------------------------------------------------------------------------------------------------------|--------|
|    | ("critical care" or "intensive care" or ICU<br>or "higher acuity" or "intensive therapy"<br>or "respiratory care").ab,ti.                                                                                                                                                                                                                                                                                                                                                                                                                                                                                                                                                                                  | 230919 |
| 10 |                                                                                                                                                                                                                                                                                                                                                                                                                                                                                                                                                                                                                                                                                                            |        |
| 11 | 7 or 8 or 9 or 10                                                                                                                                                                                                                                                                                                                                                                                                                                                                                                                                                                                                                                                                                          | 279391 |
| 12 | exp Respiratory Distress Syndrome/                                                                                                                                                                                                                                                                                                                                                                                                                                                                                                                                                                                                                                                                         | 38847  |
| 13 | exp Respiratory Insufficiency/                                                                                                                                                                                                                                                                                                                                                                                                                                                                                                                                                                                                                                                                             | 67173  |
| 14 | Respiratory Tract Diseases/                                                                                                                                                                                                                                                                                                                                                                                                                                                                                                                                                                                                                                                                                | 23035  |
| 15 | exp Severe Acute Respiratory Syndrome/<br>("acute respiratory failure" or "acute<br>respiratory disease syndrome" or "acute<br>ventilatory failure" or "Acute<br>Hypercapnic Respiratory Failure" or<br>"Acute Hypoxemic Respiratory Failure"<br>or ARDS or ARF or "Hypercapnic Acute<br>Respiratory Failure" or "Hypercapnic<br>Respiratory Failure" or "Hypoxemic<br>Acute Respiratory Failure" or<br>"Hypoxemic Respiratory Failure" or "lung<br>shock" or "posttraumatic lung failure" or<br>"posttraumatic pulmonary insufficiency"<br>or "Respiratory Depression" or<br>"Respiratory Failure" or SARS or "Severe<br>Acute Respiratory Syndrome" or "shock<br>lung" or "respiratory disease*").ab,ti. | 5698   |
| 16 |                                                                                                                                                                                                                                                                                                                                                                                                                                                                                                                                                                                                                                                                                                            | 198570 |
| 17 | 12 or 13 or 14 or 15 or 16                                                                                                                                                                                                                                                                                                                                                                                                                                                                                                                                                                                                                                                                                 | 293920 |
| 18 | exp Ventilators, Mechanical/                                                                                                                                                                                                                                                                                                                                                                                                                                                                                                                                                                                                                                                                               | 9996   |
| 19 | exp Intubation/                                                                                                                                                                                                                                                                                                                                                                                                                                                                                                                                                                                                                                                                                            | 56966  |
| 20 | exp Respiration, Artificial/<br>exp Extracorporeal Membrane                                                                                                                                                                                                                                                                                                                                                                                                                                                                                                                                                                                                                                                | 86618  |
| 21 | Oxygenation/<br>((Artificial or mechanical or pulmonary or<br>controlled or lung or intratracheal or<br>endotracheal) and (respirat* or ventilat*<br>or intubat*)).ab,ti.                                                                                                                                                                                                                                                                                                                                                                                                                                                                                                                                  | 14099  |
| 22 | ("Extracorporeal Life Support" or<br>"Extracorporeal Membrane<br>Oxygenation" or ECMO or<br>"Extracorporeal Membrane<br>Oxygenation").ab,ti.                                                                                                                                                                                                                                                                                                                                                                                                                                                                                                                                                               | 256289 |
| 23 |                                                                                                                                                                                                                                                                                                                                                                                                                                                                                                                                                                                                                                                                                                            | 18019  |
| 24 | 18 or 19 or 20 or 21 or 22 or 23                                                                                                                                                                                                                                                                                                                                                                                                                                                                                                                                                                                                                                                                           | 358046 |
| 25 | 11 or 17 or 24                                                                                                                                                                                                                                                                                                                                                                                                                                                                                                                                                                                                                                                                                             | 779989 |
| 26 | 6 and 25<br>limit 26 to (english language and<br>yr="2000 - 2022")                                                                                                                                                                                                                                                                                                                                                                                                                                                                                                                                                                                                                                         | 1118   |
| 27 |                                                                                                                                                                                                                                                                                                                                                                                                                                                                                                                                                                                                                                                                                                            | 875    |

## The Cochrane Library

Cochrane Database of Systematic Reviews: Issue 8 of 12, August 2022

Cochrane Central Register of Controlled Trials: Issue 7 of 12, July 2022

| ID  | Search Hits                                                                                                                                                                                                                                                                                                                                                                                                                                                                                                                                                                                                                   |
|-----|-------------------------------------------------------------------------------------------------------------------------------------------------------------------------------------------------------------------------------------------------------------------------------------------------------------------------------------------------------------------------------------------------------------------------------------------------------------------------------------------------------------------------------------------------------------------------------------------------------------------------------|
| #1  | ((interfacility or inter-facility or intrahospital or intra-hospital or "hospital to hospital" or "inter-ICU" or interhospital or inter-hospital)):ti,ab,kw (Word variations have been searched)<br>283                                                                                                                                                                                                                                                                                                                                                                                                                       |
| #2  | MeSH descriptor: [Patient Transfer] explode all trees 167                                                                                                                                                                                                                                                                                                                                                                                                                                                                                                                                                                     |
| #3  | MeSH descriptor: [Transportation of Patients] explode all trees 275                                                                                                                                                                                                                                                                                                                                                                                                                                                                                                                                                           |
| #4  | ((Transfer* or transport* or transition*) and (client* or patient*)):ti,ab,kw 30542                                                                                                                                                                                                                                                                                                                                                                                                                                                                                                                                           |
| #5  | #2 OR #3 OR #4 30643                                                                                                                                                                                                                                                                                                                                                                                                                                                                                                                                                                                                          |
| #6  | #1 and #5 103                                                                                                                                                                                                                                                                                                                                                                                                                                                                                                                                                                                                                 |
| #7  | MeSH descriptor: [Critical Care] explode all trees 2232                                                                                                                                                                                                                                                                                                                                                                                                                                                                                                                                                                       |
| #8  | MeSH descriptor: [Critical Care] explode all trees 2232                                                                                                                                                                                                                                                                                                                                                                                                                                                                                                                                                                       |
| #9  | MeSH descriptor: [Respiratory Care Units] explode all trees 13                                                                                                                                                                                                                                                                                                                                                                                                                                                                                                                                                                |
| #10 | (("critical care" or "intensive care" or ICU or "higher acuity" or "intensive therapy" or "respiratory care")):ti,ab,kw 36196                                                                                                                                                                                                                                                                                                                                                                                                                                                                                                 |
| #11 | #7 OR #8 OR #9 OR #10 36202                                                                                                                                                                                                                                                                                                                                                                                                                                                                                                                                                                                                   |
| #12 | MeSH descriptor: [Respiratory Distress Syndrome] explode all trees 2757                                                                                                                                                                                                                                                                                                                                                                                                                                                                                                                                                       |
| #13 | MeSH descriptor: [Respiratory Insufficiency] explode all trees 3112                                                                                                                                                                                                                                                                                                                                                                                                                                                                                                                                                           |
| #14 | MeSH descriptor: [Respiratory Tract Diseases] explode all trees 68616                                                                                                                                                                                                                                                                                                                                                                                                                                                                                                                                                         |
| #15 | MeSH descriptor: [Severe Acute Respiratory Syndrome] explode all trees 371                                                                                                                                                                                                                                                                                                                                                                                                                                                                                                                                                    |
| #16 | (("acute respiratory failure" or "acute respiratory disease syndrome" or "acute ventilatory failure" or "Acute Hypercapnic Respiratory Failure" or "Acute Hypoxemic Respiratory Failure" or ARDS or ARF or "Hypercapnic Acute Respiratory Failure" or "Hypercapnic Respiratory Failure" or "Hypoxemic Acute Respiratory Failure" or "Hypoxemic Respiratory Failure" or "lung shock" or "posttraumatic lung failure" or "posttraumatic pulmonary insufficiency" or "Respiratory Depression" or "Respiratory Failure" or SARS or "Severe Acute Respiratory Syndrome" or "shock lung" or "respiratory disease*")):ti,ab,kw 16951 |
| #17 | #12 OR #13 OR #14 OR #15 OR #16 80676                                                                                                                                                                                                                                                                                                                                                                                                                                                                                                                                                                                         |
| #18 | MeSH descriptor: [Ventilators, Mechanical] explode all trees 296                                                                                                                                                                                                                                                                                                                                                                                                                                                                                                                                                              |
| #19 | MeSH descriptor: [Intubation] explode all trees 5602                                                                                                                                                                                                                                                                                                                                                                                                                                                                                                                                                                          |
| #20 | MeSH descriptor: [Respiration, Artificial] explode all trees 6974                                                                                                                                                                                                                                                                                                                                                                                                                                                                                                                                                             |
| #21 | MeSH descriptor: [Extracorporeal Membrane Oxygenation] explode all trees 206                                                                                                                                                                                                                                                                                                                                                                                                                                                                                                                                                  |
| #22 | ((Artificial or mechanical or pulmonary or controlled or lung or intratracheal or endotracheal) and (respirat* or ventilat* or intubat*)):ti,ab,kw 81956                                                                                                                                                                                                                                                                                                                                                                                                                                                                      |
| #23 | (("Extracorporeal Life Support" or "Extracorporeal Membrane Oxygenation" or ECMO or "Extracorporeal Membrane Oxygenation")):ti,ab,kw 1134                                                                                                                                                                                                                                                                                                                                                                                                                                                                                     |
| #24 | #18 OR #19 OR #20 OR #21 OR #22 or #23 84228                                                                                                                                                                                                                                                                                                                                                                                                                                                                                                                                                                                  |
| #25 | #11 OR #17 OR #24 158309                                                                                                                                                                                                                                                                                                                                                                                                                                                                                                                                                                                                      |
| #26 | #6 AND #25 47                                                                                                                                                                                                                                                                                                                                                                                                                                                                                                                                                                                                                 |

## Embase

### No. Query Results

1 interfacility:ab,ti OR 'inter facility':ab,ti OR intrahospital:ab,ti OR 'intra hospital':ab,ti OR 'hospital to hospital':ab,ti OR 'inter-icu':ab,ti OR interhospital:ab,ti OR 'inter hospital':ab,ti 8614

2 'patient transport'/exp 32573

3 (transfer\* OR transport\* OR transition\*):ab,ti AND (patient\* OR client):ab,ti 527230

4 #2 OR #3 540649

5 'intensive care'/exp 841879

6 'intensive care unit'/exp 257285

7 'critical care':ab,ti OR 'intensive care':ab,ti OR icu:ab,ti OR 'higher acuity':ab,ti OR 'intensive therapy':ab,ti OR 'respiratory care':ab,ti 374258

8 #5 OR #6 OR #7 1099213

9 'respiratory distress syndrome'/exp 96791

10 'respiratory failure'/exp 128777

11 'respiratory tract disease'/exp 3230293

12 'acute respiratory failure'/exp 16460

13 'acute respiratory failure':ab,ti OR 'acute respiratory disease syndrome':ab,ti OR 'acute ventilatory failure':ab,ti OR 'acute hypercapnic respiratory failure':ab,ti OR 'acute hypoxemic respiratory failure':ab,ti OR ards:ab,ti OR arf:ab,ti OR 'hypercapnic acute respiratory failure':ab,ti OR 'hypercapnic respiratory failure':ab,ti OR 'hypoxemic acute respiratory failure':ab,ti OR 'hypoxemic respiratory failure':ab,ti OR 'lung shock':ab,ti OR 'posttraumatic lung failure':ab,ti OR 'posttraumatic pulmonary insufficiency':ab,ti OR 'respiratory depression':ab,ti OR 'respiratory failure':ab,ti OR sars:ab,ti OR 'severe acute respiratory syndrome':ab,ti OR 'shock lung':ab,ti OR 'respiratory disease\*':ab,ti 265318

14 #9 OR #10 OR #11 OR #12 OR #13 3335790

15 'intubation'/exp 119362

16 'artificial ventilation'/exp 266425

17 'mechanical ventilator'/exp 5738

18 'extracorporeal oxygenation'/exp 35822

19 (artificial OR mechanical OR pulmonary OR controlled OR lung OR intratracheal OR endotracheal) AND (respirat\* OR ventilat\* OR intubat\*) OR 'extracorporeal life support':ab,ti OR ecmo:ab,ti OR 'extracorporeal membrane oxygenation':ab,ti 1231954

20 #15 OR #16 OR #17 OR #18 OR #19 1294018

21 #1 AND #4 4029

22 #8 OR #14 OR #20 4404608

23 #21 AND #22 2045

24 #23 AND (2000:py OR 2001:py OR 2002:py OR 2003:py OR 2004:py OR 2005:py OR 2006:py OR 2007:py OR 2008:py OR 2009:py OR 2010:py OR 2011:py OR 2012:py OR 2013:py OR 2014:py OR 2015:py OR 2016:py OR 2017:py OR 2018:py OR 2019:py OR 2020:py OR 2021:py OR 2022:py) AND [english]/lim 1739

25 #24 NOT 'conference abstract'/it 1075

## CINAHL Plus with Full Text (EBSCOhost)

Thursday, August 04, 2022 5:09:33 PM

| #   | Query                                                                                                                                                                                                                                                                                                                                                                                                                                                                                                                                                                                                                                                                                                                                                                                                                                                                                                                                                                                                                                                            | Results |
|-----|------------------------------------------------------------------------------------------------------------------------------------------------------------------------------------------------------------------------------------------------------------------------------------------------------------------------------------------------------------------------------------------------------------------------------------------------------------------------------------------------------------------------------------------------------------------------------------------------------------------------------------------------------------------------------------------------------------------------------------------------------------------------------------------------------------------------------------------------------------------------------------------------------------------------------------------------------------------------------------------------------------------------------------------------------------------|---------|
| S26 | (S10 OR S17 OR S24) AND (S5 AND S25)                                                                                                                                                                                                                                                                                                                                                                                                                                                                                                                                                                                                                                                                                                                                                                                                                                                                                                                                                                                                                             | 628     |
| S25 | S10 OR S17 OR S24                                                                                                                                                                                                                                                                                                                                                                                                                                                                                                                                                                                                                                                                                                                                                                                                                                                                                                                                                                                                                                                | 518,504 |
| S24 | S18 OR S19 OR S20 OR S21 OR S22 OR S23                                                                                                                                                                                                                                                                                                                                                                                                                                                                                                                                                                                                                                                                                                                                                                                                                                                                                                                                                                                                                           | 102,139 |
| S23 | TI ( ("Extracorporeal Life Support" or "Extracorporeal Membrane Oxygenation" or ECMO or "Extracorporeal Membrane Oxygenation") ) OR AB ( ("Extracorporeal Life Support" or "Extracorporeal Membrane Oxygenation" or ECMO or "Extracorporeal Membrane Oxygenation") )                                                                                                                                                                                                                                                                                                                                                                                                                                                                                                                                                                                                                                                                                                                                                                                             | 6,748   |
| S22 | TI ( ((Artificial or mechanical or pulmonary or controlled or lung or intratracheal or endotracheal) and (respirat* or ventilat* or intubat*)) ) OR AB ( ((Artificial or mechanical or pulmonary or controlled or lung or intratracheal or endotracheal) and (respirat* or ventilat* or intubat*)) )                                                                                                                                                                                                                                                                                                                                                                                                                                                                                                                                                                                                                                                                                                                                                             | 60,904  |
| S21 | (MH "Extracorporeal Membrane Oxygenation")                                                                                                                                                                                                                                                                                                                                                                                                                                                                                                                                                                                                                                                                                                                                                                                                                                                                                                                                                                                                                       | 5,700   |
| S20 | (MH "Respiration, Artificial+")                                                                                                                                                                                                                                                                                                                                                                                                                                                                                                                                                                                                                                                                                                                                                                                                                                                                                                                                                                                                                                  | 37,295  |
| S19 | (MM "Ventilators, Mechanical")                                                                                                                                                                                                                                                                                                                                                                                                                                                                                                                                                                                                                                                                                                                                                                                                                                                                                                                                                                                                                                   | 2,022   |
| S18 | (MH "Intubation+")                                                                                                                                                                                                                                                                                                                                                                                                                                                                                                                                                                                                                                                                                                                                                                                                                                                                                                                                                                                                                                               | 20,096  |
| S17 | S11 OR S12 OR S13 OR S14 OR S15 OR S16                                                                                                                                                                                                                                                                                                                                                                                                                                                                                                                                                                                                                                                                                                                                                                                                                                                                                                                                                                                                                           | 350,154 |
| S16 | TI ( ("acute respiratory failure" or "acute respiratory disease syndrome" or "acute ventilatory failure" or "Acute Hypercapnic Respiratory Failure" or "Acute Hypoxemic Respiratory Failure" or ARDS or ARF or "Hypercapnic Acute Respiratory Failure" or "Hypercapnic Respiratory Failure" or "Hypoxemic Acute Respiratory Failure" or "Hypoxemic Respiratory Failure" or "lung shock" or "posttraumatic lung failure" or "posttraumatic pulmonary insufficiency" or "Respiratory Depression" or "Respiratory Failure" or SARS or "Severe Acute Respiratory Syndrome" or "shock lung" or "respiratory disease*") ) OR AB ( ("acute respiratory failure" or "acute respiratory disease syndrome" or "acute ventilatory failure" or "Acute Hypercapnic Respiratory Failure" or "Acute Hypoxemic Respiratory Failure" or ARDS or ARF or "Hypercapnic Acute Respiratory Failure" or "Hypercapnic Respiratory Failure" or "Hypoxemic Acute Respiratory Failure" or "Hypoxemic Respiratory Failure" or "lung shock" or "posttraumatic lung failure" or "posttraumatic | 32,521  |

|     |                                                                                                                                                                                                                                                                                                                    |         |
|-----|--------------------------------------------------------------------------------------------------------------------------------------------------------------------------------------------------------------------------------------------------------------------------------------------------------------------|---------|
|     | pulmonary insufficiency" or "Respiratory Depression" or "Respiratory Failure" or SARS or "Severe Acute Respiratory Syndrome" or "shock lung" or "respiratory disease*") )                                                                                                                                          |         |
| S15 | (MH "Severe Acute Respiratory Syndrome")                                                                                                                                                                                                                                                                           | 2,512   |
| S14 | (MH "Respiratory Tract Diseases+")                                                                                                                                                                                                                                                                                 | 334,808 |
| S13 | (MH "Respiratory Failure+")                                                                                                                                                                                                                                                                                        | 16,558  |
| S12 | (MM "Respiratory Distress Syndrome, Acute")                                                                                                                                                                                                                                                                        | 6,319   |
| S11 | (MH "Respiratory Distress Syndrome+")                                                                                                                                                                                                                                                                              | 4,025   |
| S10 | S6 OR S7 OR S8 OR S9                                                                                                                                                                                                                                                                                               | 148,106 |
|     | TI ( ("critical care" or "intensive care" or ICU or "higher acuity" or "intensive therapy" or "respiratory care") ) OR AB ( ("critical care" or "intensive care" or ICU or "higher acuity" or "intensive therapy" or "respiratory care") )                                                                         |         |
| S9  |                                                                                                                                                                                                                                                                                                                    | 113,638 |
| S8  | (MM "Respiratory Care Units")                                                                                                                                                                                                                                                                                      | 170     |
| S7  | (MH "Intensive Care Units+")                                                                                                                                                                                                                                                                                       | 69,412  |
| S6  | (MH "Critical Care+")                                                                                                                                                                                                                                                                                              | 31,802  |
| S5  | (S1 AND S4)                                                                                                                                                                                                                                                                                                        | 1,397   |
| S4  | S2 OR S3                                                                                                                                                                                                                                                                                                           | 71,401  |
|     | TI ( ((Transfer* or transport* or transition*) and (client* or patient*)) ) OR AB ( ((Transfer* or transport* or transition*) and (client* or patient*)) )                                                                                                                                                         |         |
| S3  |                                                                                                                                                                                                                                                                                                                    | 61,680  |
| S2  | (MH "Transportation of Patients+")                                                                                                                                                                                                                                                                                 | 12,868  |
|     | TI ( (interfacility or inter-facility or intrahospital or intra-hospital or "hospital to hospital" or "inter-ICU" or interhospital or inter-hospital) ) OR AB ( (interfacility or inter-facility or intrahospital or intra-hospital or "hospital to hospital" or "inter-ICU" or interhospital or inter-hospital) ) |         |
| S1  |                                                                                                                                                                                                                                                                                                                    |         |

PsycINFO (EBSCOhost)

Thursday, August 04, 2022 5:09:33 PM

| #   | Query      | Results |
|-----|------------|---------|
| S16 | S3 AND S15 | 16      |

|     |                                                                                                                                                                                                                                                                                                                                                                                                                                                                                                                                                                                                                                                                                                                                                                                                                                                                                                                                                                                                                                                                                                                                                                                                                                            |        |
|-----|--------------------------------------------------------------------------------------------------------------------------------------------------------------------------------------------------------------------------------------------------------------------------------------------------------------------------------------------------------------------------------------------------------------------------------------------------------------------------------------------------------------------------------------------------------------------------------------------------------------------------------------------------------------------------------------------------------------------------------------------------------------------------------------------------------------------------------------------------------------------------------------------------------------------------------------------------------------------------------------------------------------------------------------------------------------------------------------------------------------------------------------------------------------------------------------------------------------------------------------------|--------|
| S15 | S6 OR S10 OR S14                                                                                                                                                                                                                                                                                                                                                                                                                                                                                                                                                                                                                                                                                                                                                                                                                                                                                                                                                                                                                                                                                                                                                                                                                           | 20,900 |
| S14 | S11 OR S12 OR S13                                                                                                                                                                                                                                                                                                                                                                                                                                                                                                                                                                                                                                                                                                                                                                                                                                                                                                                                                                                                                                                                                                                                                                                                                          | 4,960  |
| S13 | TI ( ("Extracorporeal Life Support" or "Extracorporeal Membrane Oxygenation" or ECMO or "Extracorporeal Membrane Oxygenation") ) OR AB ( ("Extracorporeal Life Support" or "Extracorporeal Membrane Oxygenation" or ECMO or "Extracorporeal Membrane Oxygenation") )                                                                                                                                                                                                                                                                                                                                                                                                                                                                                                                                                                                                                                                                                                                                                                                                                                                                                                                                                                       | 72     |
| S12 | TI ( ((Artificial or mechanical or pulmonary or controlled or lung or intratracheal or endotracheal) and (respirat* or ventilat* or intubat*)) ) OR AB ( ((Artificial or mechanical or pulmonary or controlled or lung or intratracheal or endotracheal) and (respirat* or ventilat* or intubat*)) )                                                                                                                                                                                                                                                                                                                                                                                                                                                                                                                                                                                                                                                                                                                                                                                                                                                                                                                                       | 4,736  |
| S11 | DE "Artificial Respiration"                                                                                                                                                                                                                                                                                                                                                                                                                                                                                                                                                                                                                                                                                                                                                                                                                                                                                                                                                                                                                                                                                                                                                                                                                | 312    |
| S10 | S7 OR S8 OR S9                                                                                                                                                                                                                                                                                                                                                                                                                                                                                                                                                                                                                                                                                                                                                                                                                                                                                                                                                                                                                                                                                                                                                                                                                             | 5,698  |
| S9  | TI ( ("acute respiratory failure" or "acute respiratory disease syndrome" or "acute ventilatory failure" or "Acute Hypercapnic Respiratory Failure" or "Acute Hypoxemic Respiratory Failure" or ARDS or ARF or "Hypercapnic Acute Respiratory Failure" or "Hypercapnic Respiratory Failure" or "Hypoxemic Acute Respiratory Failure" or "Hypoxemic Respiratory Failure" or "lung shock" or "posttraumatic lung failure" or "posttraumatic pulmonary insufficiency" or "Respiratory Depression" or "Respiratory Failure" or SARS or "Severe Acute Respiratory Syndrome" or "shock lung" or "respiratory disease*") ) OR AB ( ("acute respiratory failure" or "acute respiratory disease syndrome" or "acute ventilatory failure" or "Acute Hypercapnic Respiratory Failure" or "Acute Hypoxemic Respiratory Failure" or ARDS or ARF or "Hypercapnic Acute Respiratory Failure" or "Hypercapnic Respiratory Failure" or "Hypoxemic Acute Respiratory Failure" or "Hypoxemic Respiratory Failure" or "lung shock" or "posttraumatic lung failure" or "posttraumatic pulmonary insufficiency" or "Respiratory Depression" or "Respiratory Failure" or SARS or "Severe Acute Respiratory Syndrome" or "shock lung" or "respiratory disease*") ) | 4,057  |
| S8  | DE "Respiratory Tract Disorders"                                                                                                                                                                                                                                                                                                                                                                                                                                                                                                                                                                                                                                                                                                                                                                                                                                                                                                                                                                                                                                                                                                                                                                                                           | 1,705  |
| S7  | DE "Respiratory Distress"                                                                                                                                                                                                                                                                                                                                                                                                                                                                                                                                                                                                                                                                                                                                                                                                                                                                                                                                                                                                                                                                                                                                                                                                                  | 677    |
| S6  | S4 OR S5                                                                                                                                                                                                                                                                                                                                                                                                                                                                                                                                                                                                                                                                                                                                                                                                                                                                                                                                                                                                                                                                                                                                                                                                                                   | 12,177 |
| S5  | TI ( ("critical care" or "intensive care" or ICU or "higher acuity" or "intensive therapy" or "respiratory                                                                                                                                                                                                                                                                                                                                                                                                                                                                                                                                                                                                                                                                                                                                                                                                                                                                                                                                                                                                                                                                                                                                 | 11,674 |

|    |                                                                                                                                                                                                                                                                                                                    |        |
|----|--------------------------------------------------------------------------------------------------------------------------------------------------------------------------------------------------------------------------------------------------------------------------------------------------------------------|--------|
|    | care") ) OR AB ( ("critical care" or "intensive care" or ICU or "higher acuity" or "intensive therapy" or "respiratory care" ) )                                                                                                                                                                                   |        |
| S4 | DE "Intensive Care"                                                                                                                                                                                                                                                                                                | 4,905  |
| S3 | S1 AND S2                                                                                                                                                                                                                                                                                                          | 76     |
| S2 | TI ( ((Transfer* or transport* or transition*) and (client* or patient*)) ) OR AB ( ((Transfer* or transport* or transition*) and (client* or patient*)) )                                                                                                                                                         | 31,930 |
| S1 | TI ( (interfacility or inter-facility or intrahospital or intra-hospital or "hospital to hospital" or "inter-ICU" or interhospital or inter-hospital) ) OR AB ( (interfacility or inter-facility or intrahospital or intra-hospital or "hospital to hospital" or "inter-ICU" or interhospital or inter-hospital) ) |        |

## Database Search Overview

| Database                                                                                                                 | Coverage         | Date Searched | Results |
|--------------------------------------------------------------------------------------------------------------------------|------------------|---------------|---------|
| Ovid MEDLINE(R) and Epub Ahead of Print, In-Process, In-Data-Review & Other Non-Indexed Citations, Daily and Versions(R) | 1946 to present  | 03/01/2024    | 81      |
| Cochrane Database of Systematic Reviews (Wiley)                                                                          | 1995 to present  | 03/01/2024    | 0       |
| Cochrane Central Register of Controlled Trials (Wiley)                                                                   | N/A              | 03/01/2024    | 51      |
| Embase (Elsevier)                                                                                                        | 1947 to present  | 03/01/2024    | 394     |
| CINAHL Plus with Full Text (EBSCOhost)                                                                                   | 1937 to present  | 03/01/2024    | 91      |
| APA PsycInfo (EBSCOhost)                                                                                                 | 1800s to present | 03/01/2024    | 524     |
| Total                                                                                                                    |                  |               | 1141    |
| Total After De-Duplication                                                                                               |                  |               | 430     |

We searched the databases listed above on March 1, 2024. Records from each database were exported to EndNote. Duplicates were removed through the "Find Duplicates" function within EndNote and manual review. Search strategies from each of the bibliographic databases are available below.

Ovid MEDLINE(R) ALL <1946 to February 26, 2024>

1 (interfacility or inter-facility or intrahospital or intra-hospital or "hospital to hospital" or "inter-ICU" or interhospital or inter-hospital).ab,ti. 9660



2 exp Patient Transfer/ 9789  
 3 exp "Transportation of Patients"/ 18268  
 4 ((Transfer\* or transport\* or transition\*) and (client\* or patient\*)).ab,ti. 283919  
 5 2 or 3 or 4 301272  
 6 1 and 5 3174  
 7 exp Critical Care/ 67838  
 8 exp Intensive Care Units/ 108619  
 9 exp Respiratory Care Units/ 626  
 10 ("critical care" or "intensive care" or ICU or "higher acuity" or "intensive therapy" or "respiratory care").ab,ti. 261492  
 11 7 or 8 or 9 or 10311038  
 12 exp Respiratory Distress Syndrome/ 41155  
 13 exp Respiratory Insufficiency/ 69450  
 14 Respiratory Tract Diseases/ 23479  
 15 exp Severe Acute Respiratory Syndrome/ 5742  
 16 ("acute respiratory failure" or "acute respiratory disease syndrome" or "acute ventilatory failure" or "Acute Hypercapnic Respiratory Failure" or "Acute Hypoxemic Respiratory Failure" or ARDS or ARF or "Hypercapnic Acute Respiratory Failure" or "Hypercapnic Respiratory Failure" or "Hypoxemic Acute Respiratory Failure" or "Hypoxemic Respiratory Failure" or "lung shock" or "posttraumatic lung failure" or "posttraumatic pulmonary insufficiency" or "Respiratory Depression" or "Respiratory Failure" or SARS or "Severe Acute Respiratory Syndrome" or "shock lung" or "respiratory disease\*").ab,ti. 248741  
 17 12 or 13 or 14 or 15 or 16 346036  
 18 exp Ventilators, Mechanical/ 10355  
 19 exp Intubation/ 58587  
 20 exp Respiration, Artificial/ 90326  
 21 exp Extracorporeal Membrane Oxygenation/ 15900  
 22 ((Artificial or mechanical or pulmonary or controlled or lung or intratracheal or endotracheal) and (respirat\* or ventilat\* or intubat\*)).ab,ti. 281961  
 23 ("Extracorporeal Life Support" or "Extracorporeal Membrane Oxygenation" or ECMO or "Extracorporeal Membrane Oxygenation").ab,ti. 21520  
 24 18 or 19 or 20 or 21 or 22 or 23 388835  
 25 11 or 17 or 24 876134  
 26 6 and 25 1267  
 27 limit 26 to (english language and yr="2000 - 2022") 897  
 28 limit 27 to yr="2022 -Current" 81

## The Cochrane Library

Cochrane Central Register of Controlled Trials  
 Issue 2 of 12, February 2024

Cochrane Database of Systematic Reviews  
 Issue 2 of 12, February 2024

Search Name: Interfacility Transportation ARDS

Date Run: 27/02/2024 22:08:44

Comment:

| ID  | Search Hits                                                                                                                                                                                                                                                                                                                                                                                                                                                                                                                                                                                                           |
|-----|-----------------------------------------------------------------------------------------------------------------------------------------------------------------------------------------------------------------------------------------------------------------------------------------------------------------------------------------------------------------------------------------------------------------------------------------------------------------------------------------------------------------------------------------------------------------------------------------------------------------------|
| #1  | (((interfacility or inter-facility or intrahospital or intra-hospital or "hospital to hospital" or "inter-ICU" or interhospital or inter-hospital))):ti,ab,kw 320                                                                                                                                                                                                                                                                                                                                                                                                                                                     |
| #2  | MeSH descriptor: [Patient Transfer] explode all trees 244                                                                                                                                                                                                                                                                                                                                                                                                                                                                                                                                                             |
| #3  | MeSH descriptor: [Transportation of Patients] explode all trees 381                                                                                                                                                                                                                                                                                                                                                                                                                                                                                                                                                   |
| #4  | (((Transfer* or transport* or transition*) and (client* or patient*))):ti,ab,kw 35431                                                                                                                                                                                                                                                                                                                                                                                                                                                                                                                                 |
| #5  | #2 OR #3 OR #4 35575                                                                                                                                                                                                                                                                                                                                                                                                                                                                                                                                                                                                  |
| #6  | #1 and #5 123                                                                                                                                                                                                                                                                                                                                                                                                                                                                                                                                                                                                         |
| #7  | MeSH descriptor: [Critical Care] explode all trees 3065                                                                                                                                                                                                                                                                                                                                                                                                                                                                                                                                                               |
| #8  | MeSH descriptor: [Critical Care] explode all trees 3065                                                                                                                                                                                                                                                                                                                                                                                                                                                                                                                                                               |
| #9  | MeSH descriptor: [Respiratory Care Units] explode all trees 15                                                                                                                                                                                                                                                                                                                                                                                                                                                                                                                                                        |
| #10 | (((("critical care" or "intensive care" or ICU or "higher acuity" or "intensive therapy" or "respiratory care"))):ti,ab,kw 42178                                                                                                                                                                                                                                                                                                                                                                                                                                                                                      |
| #11 | #7 OR #8 OR #9 OR #10 42184                                                                                                                                                                                                                                                                                                                                                                                                                                                                                                                                                                                           |
| #12 | MeSH descriptor: [Respiratory Distress Syndrome] explode all trees 3564                                                                                                                                                                                                                                                                                                                                                                                                                                                                                                                                               |
| #13 | MeSH descriptor: [Respiratory Insufficiency] explode all trees 3915                                                                                                                                                                                                                                                                                                                                                                                                                                                                                                                                                   |
| #14 | MeSH descriptor: [Respiratory Tract Diseases] explode all trees 91263                                                                                                                                                                                                                                                                                                                                                                                                                                                                                                                                                 |
| #15 | MeSH descriptor: [Severe Acute Respiratory Syndrome] explode all trees 270                                                                                                                                                                                                                                                                                                                                                                                                                                                                                                                                            |
| #16 | (((("acute respiratory failure" or "acute respiratory disease syndrome" or "acute ventilatory failure" or "Acute Hypercapnic Respiratory Failure" or "Acute Hypoxemic Respiratory Failure" or ARDS or ARF or "Hypercapnic Acute Respiratory Failure" or "Hypercapnic Respiratory Failure" or "Hypoxemic Acute Respiratory Failure" or "Hypoxemic Respiratory Failure" or "lung shock" or "posttraumatic lung failure" or "posttraumatic pulmonary insufficiency" or "Respiratory Depression" or "Respiratory Failure" or SARS or "Severe Acute Respiratory Syndrome" or "shock lung" or "respiratory disease")) 23872 |
| #17 | #12 OR #13 OR #14 OR #15 OR #16 105524                                                                                                                                                                                                                                                                                                                                                                                                                                                                                                                                                                                |
| #18 | MeSH descriptor: [Ventilators, Mechanical] explode all trees 428                                                                                                                                                                                                                                                                                                                                                                                                                                                                                                                                                      |
| #19 | MeSH descriptor: [Intubation] explode all trees 6742                                                                                                                                                                                                                                                                                                                                                                                                                                                                                                                                                                  |
| #20 | MeSH descriptor: [Respiration, Artificial] explode all trees 9352                                                                                                                                                                                                                                                                                                                                                                                                                                                                                                                                                     |
| #21 | MeSH descriptor: [Extracorporeal Membrane Oxygenation] explode all trees 355                                                                                                                                                                                                                                                                                                                                                                                                                                                                                                                                          |
| #22 | (((Artificial or mechanical or pulmonary or controlled or lung or intratracheal or endotracheal) and (respirat* or ventilat* or intubat*))):ti,ab,kw 96183                                                                                                                                                                                                                                                                                                                                                                                                                                                            |
| #23 | (((("Extracorporeal Life Support" or "Extracorporeal Membrane Oxygenation" or ECMO or "Extracorporeal Membrane Oxygenation")) 1459                                                                                                                                                                                                                                                                                                                                                                                                                                                                                    |
| #24 | #18 OR #19 OR #20 OR #21 OR #22 or #23 99019                                                                                                                                                                                                                                                                                                                                                                                                                                                                                                                                                                          |
| #25 | #11 OR #17 OR #24 192749                                                                                                                                                                                                                                                                                                                                                                                                                                                                                                                                                                                              |
| #26 | #6 AND #25 51                                                                                                                                                                                                                                                                                                                                                                                                                                                                                                                                                                                                         |

Embase

| No. | Query                          | Results | Date     |
|-----|--------------------------------|---------|----------|
| #24 | #21 AND #22 AND [2022-2024]/py | 394     | 1-Mar-24 |

#23 #21 AND #22 2350 1-Mar-24  
 #22 #8 OR #14 OR #20 4866170 1-Mar-24  
 #21 #1 AND #4 4640 1-Mar-24  
 #20 #15 OR #16 OR #17 OR #18 OR #19 1294018 1-Mar-24  
 #19 (artificial OR mechanical OR pulmonary OR controlled OR lung OR intratracheal OR  
 endotracheal) AND (respirat\* OR ventilat\* OR intubat\*) OR 'extracorporeal life support':ab,ti  
 OR ecmo:ab,ti OR 'extracorporeal membrane oxygenation':ab,ti 1231954 1-Mar-24  
 #18 'extracorporeal oxygenation'/exp 35822 1-Mar-24  
 #17 'mechanical ventilator'/exp 5738 1-Mar-24  
 #16 'artificial ventilation'/exp 266425 1-Mar-24  
 #15 'intubation'/exp 119362 1-Mar-24  
 #14 #9 OR #10 OR #11 OR #12 OR #13 3335790 1-Mar-24  
 #13 'acute respiratory failure':ab,ti OR 'acute respiratory disease syndrome':ab,ti OR 'acute  
 ventilatory failure':ab,ti OR 'acute hypercapnic respiratory failure':ab,ti OR 'acute hypoxemic  
 respiratory failure':ab,ti OR ards:ab,ti OR arf:ab,ti OR 'hypercapnic acute respiratory  
 failure':ab,ti OR 'hypercapnic respiratory failure':ab,ti OR 'hypoxemic acute respiratory  
 failure':ab,ti OR 'hypoxemic respiratory failure':ab,ti OR 'lung shock':ab,ti OR 'posttraumatic  
 lung failure':ab,ti OR 'posttraumatic pulmonary insufficiency':ab,ti OR 'respiratory  
 depression':ab,ti OR 'respiratory failure':ab,ti OR sars:ab,ti OR 'severe acute respiratory  
 syndrome':ab,ti OR 'shock lung':ab,ti OR 'respiratory disease\*':ab,ti 265318 1-Mar-  
 24  
 #12 'acute respiratory failure'/exp 16460 1-Mar-24  
 #11 'respiratory tract disease'/exp 3230293 1-Mar-24  
 #10 'respiratory failure'/exp 128777 1-Mar-24  
 #9 'respiratory distress syndrome'/exp 96791 1-Mar-24  
 #8 #5 OR #6 OR #7 1099213 1-Mar-24  
 #7 'critical care':ab,ti OR 'intensive care':ab,ti OR icu:ab,ti OR 'higher acuity':ab,ti OR  
 'intensive therapy':ab,ti OR 'respiratory care':ab,ti 374258 1-Mar-24  
 #6 'intensive care unit'/exp 257285 1-Mar-24  
 #5 'intensive care'/exp 841879 1-Mar-24  
 #4 #2 OR #3 540649 1-Mar-24  
 #3 (transfer\* OR transport\* OR transition\*) AND patient\*:ab,ti 527230 1-Mar-  
 24  
 #2 'patient transport'/exp 32573 1-Mar-24  
 #1 interfacility:ab,ti OR 'inter facility':ab,ti OR intrahospital:ab,ti OR 'intra hospital':ab,ti OR  
 'hospital to hospital':ab,ti OR 'inter-icu':ab,ti OR interhospital:ab,ti OR 'inter hospital':ab,ti  
 8614 1-Mar-24

## PsycINFO (EBSCOhost)

| #   | Query                                                                                                                                                                                                                                                                                                                                                                                                                                                                                                                                                                                                                                                                                                                                                                                                                                                                                                                                                                                                                                                                                                                                                                                                                                      | Limiters/Expanders                    | Last Run Via                             | Results |
|-----|--------------------------------------------------------------------------------------------------------------------------------------------------------------------------------------------------------------------------------------------------------------------------------------------------------------------------------------------------------------------------------------------------------------------------------------------------------------------------------------------------------------------------------------------------------------------------------------------------------------------------------------------------------------------------------------------------------------------------------------------------------------------------------------------------------------------------------------------------------------------------------------------------------------------------------------------------------------------------------------------------------------------------------------------------------------------------------------------------------------------------------------------------------------------------------------------------------------------------------------------|---------------------------------------|------------------------------------------|---------|
| S16 | S3 AND S15                                                                                                                                                                                                                                                                                                                                                                                                                                                                                                                                                                                                                                                                                                                                                                                                                                                                                                                                                                                                                                                                                                                                                                                                                                 | Expanders - Apply equivalent subjects |                                          |         |
|     | Search modes - Boolean/Phrase                                                                                                                                                                                                                                                                                                                                                                                                                                                                                                                                                                                                                                                                                                                                                                                                                                                                                                                                                                                                                                                                                                                                                                                                              |                                       | Interface - EBSCOhost Research Databases |         |
|     | Search Screen - Advanced Search                                                                                                                                                                                                                                                                                                                                                                                                                                                                                                                                                                                                                                                                                                                                                                                                                                                                                                                                                                                                                                                                                                                                                                                                            |                                       |                                          |         |
|     | Database - CINAHL Plus with Full Text                                                                                                                                                                                                                                                                                                                                                                                                                                                                                                                                                                                                                                                                                                                                                                                                                                                                                                                                                                                                                                                                                                                                                                                                      | 524                                   |                                          |         |
| S15 | S6 OR S10 OR S14                                                                                                                                                                                                                                                                                                                                                                                                                                                                                                                                                                                                                                                                                                                                                                                                                                                                                                                                                                                                                                                                                                                                                                                                                           | Expanders - Apply equivalent subjects |                                          |         |
|     | Search modes - Boolean/Phrase                                                                                                                                                                                                                                                                                                                                                                                                                                                                                                                                                                                                                                                                                                                                                                                                                                                                                                                                                                                                                                                                                                                                                                                                              |                                       | Interface - EBSCOhost Research Databases |         |
|     | Search Screen - Advanced Search                                                                                                                                                                                                                                                                                                                                                                                                                                                                                                                                                                                                                                                                                                                                                                                                                                                                                                                                                                                                                                                                                                                                                                                                            |                                       |                                          |         |
|     | Database - CINAHL Plus with Full Text                                                                                                                                                                                                                                                                                                                                                                                                                                                                                                                                                                                                                                                                                                                                                                                                                                                                                                                                                                                                                                                                                                                                                                                                      | 191,761                               |                                          |         |
| S14 | S11 OR S12 OR S13                                                                                                                                                                                                                                                                                                                                                                                                                                                                                                                                                                                                                                                                                                                                                                                                                                                                                                                                                                                                                                                                                                                                                                                                                          | Expanders - Apply equivalent subjects |                                          |         |
|     | Search modes - Boolean/Phrase                                                                                                                                                                                                                                                                                                                                                                                                                                                                                                                                                                                                                                                                                                                                                                                                                                                                                                                                                                                                                                                                                                                                                                                                              |                                       | Interface - EBSCOhost Research Databases |         |
|     | Search Screen - Advanced Search                                                                                                                                                                                                                                                                                                                                                                                                                                                                                                                                                                                                                                                                                                                                                                                                                                                                                                                                                                                                                                                                                                                                                                                                            |                                       |                                          |         |
|     | Database - CINAHL Plus with Full Text                                                                                                                                                                                                                                                                                                                                                                                                                                                                                                                                                                                                                                                                                                                                                                                                                                                                                                                                                                                                                                                                                                                                                                                                      | 69,821                                |                                          |         |
| S13 | TI ( ("Extracorporeal Life Support" or "Extracorporeal Membrane Oxygenation" or ECMO or "Extracorporeal Membrane Oxygenation" ) OR AB ( ("Extracorporeal Life Support" or "Extracorporeal Membrane Oxygenation" or ECMO or "Extracorporeal Membrane Oxygenation" ) )                                                                                                                                                                                                                                                                                                                                                                                                                                                                                                                                                                                                                                                                                                                                                                                                                                                                                                                                                                       | Expanders - Apply equivalent subjects |                                          |         |
|     | Search modes - Boolean/Phrase                                                                                                                                                                                                                                                                                                                                                                                                                                                                                                                                                                                                                                                                                                                                                                                                                                                                                                                                                                                                                                                                                                                                                                                                              |                                       | Interface - EBSCOhost Research Databases |         |
|     | Search Screen - Advanced Search                                                                                                                                                                                                                                                                                                                                                                                                                                                                                                                                                                                                                                                                                                                                                                                                                                                                                                                                                                                                                                                                                                                                                                                                            |                                       |                                          |         |
|     | Database - CINAHL Plus with Full Text                                                                                                                                                                                                                                                                                                                                                                                                                                                                                                                                                                                                                                                                                                                                                                                                                                                                                                                                                                                                                                                                                                                                                                                                      | 7,800                                 |                                          |         |
| S12 | TI ( ((Artificial or mechanical or pulmonary or controlled or lung or intratracheal or endotracheal) and (respirat* or ventilat* or intubat*)) ) OR AB ( ((Artificial or mechanical or pulmonary or controlled or lung or intratracheal or endotracheal) and (respirat* or ventilat* or intubat*)) )                                                                                                                                                                                                                                                                                                                                                                                                                                                                                                                                                                                                                                                                                                                                                                                                                                                                                                                                       | Expanders - Apply equivalent subjects |                                          |         |
|     | Search modes - Boolean/Phrase                                                                                                                                                                                                                                                                                                                                                                                                                                                                                                                                                                                                                                                                                                                                                                                                                                                                                                                                                                                                                                                                                                                                                                                                              |                                       | Interface - EBSCOhost Research Databases |         |
|     | Search Screen - Advanced Search                                                                                                                                                                                                                                                                                                                                                                                                                                                                                                                                                                                                                                                                                                                                                                                                                                                                                                                                                                                                                                                                                                                                                                                                            |                                       |                                          |         |
|     | Database - CINAHL Plus with Full Text                                                                                                                                                                                                                                                                                                                                                                                                                                                                                                                                                                                                                                                                                                                                                                                                                                                                                                                                                                                                                                                                                                                                                                                                      | 63,513                                |                                          |         |
| S11 | DE "Artificial Respiration"                                                                                                                                                                                                                                                                                                                                                                                                                                                                                                                                                                                                                                                                                                                                                                                                                                                                                                                                                                                                                                                                                                                                                                                                                | Expanders - Apply equivalent subjects |                                          |         |
|     | Search modes - Boolean/Phrase                                                                                                                                                                                                                                                                                                                                                                                                                                                                                                                                                                                                                                                                                                                                                                                                                                                                                                                                                                                                                                                                                                                                                                                                              |                                       | Interface - EBSCOhost Research Databases |         |
|     | Search Screen - Advanced Search                                                                                                                                                                                                                                                                                                                                                                                                                                                                                                                                                                                                                                                                                                                                                                                                                                                                                                                                                                                                                                                                                                                                                                                                            |                                       |                                          |         |
|     | Database - CINAHL Plus with Full Text                                                                                                                                                                                                                                                                                                                                                                                                                                                                                                                                                                                                                                                                                                                                                                                                                                                                                                                                                                                                                                                                                                                                                                                                      | 26,757                                |                                          |         |
| S10 | S7 OR S8 OR S9                                                                                                                                                                                                                                                                                                                                                                                                                                                                                                                                                                                                                                                                                                                                                                                                                                                                                                                                                                                                                                                                                                                                                                                                                             | Expanders - Apply equivalent subjects |                                          |         |
|     | Search modes - Boolean/Phrase                                                                                                                                                                                                                                                                                                                                                                                                                                                                                                                                                                                                                                                                                                                                                                                                                                                                                                                                                                                                                                                                                                                                                                                                              |                                       | Interface - EBSCOhost Research Databases |         |
|     | Search Screen - Advanced Search                                                                                                                                                                                                                                                                                                                                                                                                                                                                                                                                                                                                                                                                                                                                                                                                                                                                                                                                                                                                                                                                                                                                                                                                            |                                       |                                          |         |
|     | Database - CINAHL Plus with Full Text                                                                                                                                                                                                                                                                                                                                                                                                                                                                                                                                                                                                                                                                                                                                                                                                                                                                                                                                                                                                                                                                                                                                                                                                      | 34,981                                |                                          |         |
| S9  | TI ( ("acute respiratory failure" or "acute respiratory disease syndrome" or "acute ventilatory failure" or "Acute Hypercapnic Respiratory Failure" or "Acute Hypoxemic Respiratory Failure" or ARDS or ARF or "Hypercapnic Acute Respiratory Failure" or "Hypercapnic Respiratory Failure" or "Hypoxemic Acute Respiratory Failure" or "Hypoxemic Respiratory Failure" or "lung shock" or "posttraumatic lung failure" or "posttraumatic pulmonary insufficiency" or "Respiratory Depression" or "Respiratory Failure" or SARS or "Severe Acute Respiratory Syndrome" or "shock lung" or "respiratory disease*") ) OR AB ( ("acute respiratory failure" or "acute respiratory disease syndrome" or "acute ventilatory failure" or "Acute Hypercapnic Respiratory Failure" or "Acute Hypoxemic Respiratory Failure" or ARDS or ARF or "Hypercapnic Acute Respiratory Failure" or "Hypercapnic Respiratory Failure" or "Hypoxemic Acute Respiratory Failure" or "Hypoxemic Respiratory Failure" or "lung shock" or "posttraumatic lung failure" or "posttraumatic pulmonary insufficiency" or "Respiratory Depression" or "Respiratory Failure" or SARS or "Severe Acute Respiratory Syndrome" or "shock lung" or "respiratory disease*") ) | Expanders - Apply equivalent subjects |                                          |         |
|     | Search modes - Boolean/Phrase                                                                                                                                                                                                                                                                                                                                                                                                                                                                                                                                                                                                                                                                                                                                                                                                                                                                                                                                                                                                                                                                                                                                                                                                              |                                       | Interface - EBSCOhost Research Databases |         |

Search Screen - Advanced Search  
 Database - CINAHL Plus with Full Text 34,981  
 S8 DE "Respiratory Tract Disorders" Expanders - Apply equivalent subjects  
 Search modes - Boolean/Phrase Interface - EBSCOhost Research Databases  
 Search Screen - Advanced Search  
 Database - CINAHL Plus with Full Text 29,085  
 S7 DE "Respiratory Distress" Expanders - Apply equivalent subjects  
 Search modes - Boolean/Phrase Interface - EBSCOhost Research Databases  
 Search Screen - Advanced Search  
 Database - CINAHL Plus with Full Text 21,721  
 S6 S4 OR S5 Expanders - Apply equivalent subjects  
 Search modes - Boolean/Phrase Interface - EBSCOhost Research Databases  
 Search Screen - Advanced Search  
 Database - CINAHL Plus with Full Text 118,514  
 S5 TI ( "critical care" or "intensive care" or ICU or "higher acuity" or "intensive therapy" or  
 "respiratory care" ) OR AB ( ("critical care" or "intensive care" or ICU or "higher acuity" or "intensive  
 therapy" or "respiratory care" ) ) Expanders - Apply equivalent subjects  
 Search modes - Boolean/Phrase Interface - EBSCOhost Research Databases  
 Search Screen - Advanced Search  
 Database - CINAHL Plus with Full Text 118,514  
 S4 DE "Intensive Care" Expanders - Apply equivalent subjects  
 Search modes - Boolean/Phrase Interface - EBSCOhost Research Databases  
 Search Screen - Advanced Search  
 Database - CINAHL Plus with Full Text 123,985  
 S3 S1 AND S2 Expanders - Apply equivalent subjects  
 Search modes - Boolean/Phrase Interface - EBSCOhost Research Databases  
 Search Screen - Advanced Search  
 Database - CINAHL Plus with Full Text 1,380  
 S2 TI ( ((Transfer\* or transport\* or transition\*) and (client\* or patient\*)) ) OR AB ( ((Transfer\* or  
 transport\* or transition\*) and (client\* or patient\*)) ) Expanders - Apply equivalent subjects  
 Search modes - Boolean/Phrase Interface - EBSCOhost Research Databases  
 Search Screen - Advanced Search  
 Database - CINAHL Plus with Full Text 65,726  
 S1 TI ( (interfacility or inter-facility or intrahospital or intra-hospital or "hospital to hospital" or "inter-  
 ICU" or interhospital or inter-hospital) ) OR AB ( (interfacility or inter-facility or intrahospital or intra-  
 hospital or "hospital to hospital" or "inter-ICU" or interhospital or inter-hospital) ) Expanders - Apply  
 equivalent subjects  
 Search modes - Boolean/Phrase Interface - EBSCOhost Research Databases  
 Search Screen - Advanced Search  
 Database - CINAHL Plus with Full Text 2,531
